# Supplementary material for: On the path to rabies elimination: The need for risk assessments to improve administration of post-exposure prophylaxis
Source: PubMed Central journal article supplement (PMC6863041; doi:10.1016/j.vaccine.2018.11.066), 2019-10-03
Supplement: mmc1.pdf [file mmc1.pdf]

**FORM 1. Primary patient data upon visit of patient to clinic**

Clinic: (Candijay/Carmen/Jagna/Loon/Tagbilaran/Talibon/Ubay)

**VICTIM PROFILE**

Name \_\_\_\_\_  
Age \_\_\_\_\_ years  
\_\_\_\_\_ months  
Sex  Male  Female  
Status of the victim  Alive  Dead, date of death(MM/DD/YYYY) \_\_\_\_\_

Address of the victim  
House name/number and street \_\_\_\_\_  
Sitio \_\_\_\_\_  
Barangay \_\_\_\_\_  
Municipality/city \_\_\_\_\_

Telephone Number \_\_\_\_\_ **VITAL INFORMATION**  
Bite date (MM/DD/YYYY) \_\_\_\_\_ **VITAL INFORMATION**

Date Type  Date bitten  Date of first treatment  
Activity Date Estimate  Accurate  +/- 1 day  +/- 1 week  
 +/- 1 month  +/- 1 year

Location where biting incident happened  Household  Neighborhood  
 Others, specify \_\_\_\_\_

Time of Bite \_\_\_\_\_  
Site of Bite (body part/s) \_\_\_\_\_  
Number of Wounds \_\_\_\_\_ Brief description of wound type \_\_\_\_\_

Bite provoked?  Yes  No  
Description of the circumstance \_\_\_\_\_

Nature of Bite  Minor  Moderate  Severe  
Bite Category (WHO Classification)  I  II  III

**Treatment Received**  
Wound washed?  No  
 Water  
 With soap  
 Antiseptic  
 Alcohol  
 Iodine  
 Others (specify) \_\_\_\_\_

Time interval between bite and wound treatment \_\_\_\_\_ minutes/hours/days  
Application of local irritants (e.g. bleach, gasoline)  Yes, specify \_\_\_\_\_  No

Wound dressed/bandaged?  Yes  No  
Wound sutured?  Yes  No  
If traditional method, specify  Tandok  Stone  Horn  Ritual  
 Others, specify \_\_\_\_\_

Check if vaccine administered  
Day 0  Date (MM/DD/YYYY) \_\_\_\_\_ **Patient follow up starts 14 days after this date**  
Day 3  Date (MM/DD/YYYY) \_\_\_\_\_ **Update Wise-Monkey entry of patient**  
Day 7  Date (MM/DD/YYYY) \_\_\_\_\_ **Update Wise-Monkey entry of patient**  
Day 28/30  Date (MM/DD/YYYY) \_\_\_\_\_ **Update Wise-Monkey entry of patient**

Treatment Type  IM  ID  
Antitetanus  Yes  No  
Immunoglobulin Type  ERIG  HRIG  No  
Dose amount of immunoglobulin \_\_\_\_\_ ml or \_\_\_\_\_ IU

If patient is dead, signs observed prior to death of the victim \_\_\_\_\_ **PROMPT FOR INVESTIGATION**  
\_\_\_\_\_ **ALL DEATHS SHOULD BE INVESTIGATED IN THE FIELD**

**IF PATIENT DID NOT GO FOR OR DID NOT CONTINUE TREATMENT:**  
Reason/s why patient did not get treatment: \_\_\_\_\_ **ASK ABOUT STATUS OF BITING ANIMAL. IF CASE IS**  
\_\_\_\_\_ **SUSPICIOUS, INVESTIGATE AND FOLLOW UP ON**  
\_\_\_\_\_ **PATIENT FOR TREATMENT**

**FORM 2. Patient follow up (14 days after Day 0 of PEP)**

**ID of bite victim** \_\_\_\_\_ *ID assigned by Wise-Monkey*  
**Name of the victim** \_\_\_\_\_  
**Status of the victim**  Alive  Dead, date of death(MM/DD/YYYY) \_\_\_\_\_

**Species of biting animal** \_\_\_\_\_  
**Breed of biting animal** \_\_\_\_\_  
**Sex of biting animal**  Male  Female  
**Age of biting animal**  
\_\_\_\_ years  
\_\_\_\_ months

**If owned:** *If not owned skip questions about the owner*  
**Name of owner** \_\_\_\_\_  
**Address of owner**  
House name/number and street \_\_\_\_\_  
Sitio \_\_\_\_\_  
Barangay \_\_\_\_\_  
Municipality/city \_\_\_\_\_

**Pet Management**  Pet  Confined  Free/Stray  Wild  
**Was biting animal available for 10-14 day observation**  Yes  No

**Rabies vaccination status of dog, if known**  
Unvaccinated   
Vaccinated within the last 12 months   
Vaccinated more than 12 months ago

**Status of Animal**  
Healthy  *IF HEALTHY, END HERE. NO NEED FOR FIELD INVESTIGATION*  
Sick  *PROMPT FOR INVESTIGATION*  
Died  *PROMPT FOR INVESTIGATION. MUST DO OUTBREAK INVESTIGATION*  
Killed  *PROMPT FOR INVESTIGATION*  
Not traceable  *PROMPT FOR INVESTIGATION. IF DOG NOT FOUND, CONTINUE PEP OF PATIENT*  
Unknown  *PROMPT FOR INVESTIGATION*

**FORM 3. Animal Bite Investigation Form - to be completed in the field (only when field investigation is necessary)**

Investigated by: \_\_\_\_\_

Date of investigation: \_\_\_\_\_

ID of bite victim: \_\_\_\_\_ *ID assigned by Wise-Monkey*

**ANIMAL PROFILE**

If owned: \_\_\_\_\_ *If not owned skip questions about the owner*

Name of owner \_\_\_\_\_

Address of owner

House name/number and street \_\_\_\_\_

Sitio \_\_\_\_\_

Barangay \_\_\_\_\_

Municipality/city \_\_\_\_\_

Telephone number of owner \_\_\_\_\_

Species \_\_\_\_\_

Breed \_\_\_\_\_

Sex  Male  Female

Age \_\_\_\_\_ years  
\_\_\_\_\_ months

Pet Management  Pet  Confined  
 Free/Stray  Wild

Status of Animal  Sick  Died  Killed  
 Not traceable  Unknown

Cause of Death  Euthanasia  Accident  Found dead  
 Illness  Others, specify \_\_\_\_\_

Date of Death \_\_\_\_\_

Time of Death \_\_\_\_\_

IF SICK, duration of illness *Skip question if no one can answer (because owner is unknown)*

From (MM/DD/YYYY) \_\_\_\_\_

To (MM/DD/YYYY) \_\_\_\_\_

Rabies vaccination status of dog, if known  Unvaccinated  Vaccinated within the last 12 months *Skip question if no one can answer (because owner is unknown)*  
 Vaccinated more than 12 months ago

Vaccination History *Skip question if no one can answer (because owner is unknown)*

Rabies  Date (MM/DD/YYYY) \_\_\_\_\_

Other \_\_\_\_\_  Date (MM/DD/YYYY) \_\_\_\_\_

Availability of biting animal for 10-14 day observation  Yes  No

Classification  Proven rabid  Suspect rabid  Healthy *To be completed after lab test*

Postmortem/lab test report  Yes  No

Result of postmortem/lab test report  Positive  Negative

Number of dogs owned \_\_\_\_\_ *Skip question if no one can answer (because owner is unknown)*

Estimated number of dogs in the community \_\_\_\_\_

| Behavioral Changes         | Check                    | Other Signs of Illness | Check                    |
|----------------------------|--------------------------|------------------------|--------------------------|
| None                       | <input type="checkbox"/> | None                   | <input type="checkbox"/> |
| Restlessness               | <input type="checkbox"/> | Diarrhea               | <input type="checkbox"/> |
| Apprehensive watchful look | <input type="checkbox"/> | Vomiting               | <input type="checkbox"/> |
| Unprovoked aggressiveness  | <input type="checkbox"/> | Inappetence            | <input type="checkbox"/> |
| Aimless running            | <input type="checkbox"/> | Jaundice               | <input type="checkbox"/> |
| Deprived appetite          | <input type="checkbox"/> | Skin lesions           | <input type="checkbox"/> |
| Drooling saliva            | <input type="checkbox"/> | Lethargy               | <input type="checkbox"/> |
| Paralysis:                 | <input type="checkbox"/> | Nasal/Ocular discharge | <input type="checkbox"/> |
| Hindleg                    | <input type="checkbox"/> | Convulsion/Seizures    | <input type="checkbox"/> |
| Jaw/Tongue                 | <input type="checkbox"/> |                        |                          |

*If these were observed even in an animal of unknown origin, COMPLETE THIS INFORMATION*

Number of other persons bitten by the same animal (during the same week) \_\_\_\_\_ *Record their names* \_\_\_\_\_

*If no records for these victims, carry out patient follow up survey in field*

Did biting animal bite other animals?  Yes, date (MM/DD/YYYY) \_\_\_\_\_  No

If Yes, record names of other animal owners: \_\_\_\_\_ *Carry out field investigation with the newly identified owner of other bitten animals*

Was the animal bitten by a suspect rabid animal?  Yes, date (MM/DD/YYYY) \_\_\_\_\_  No

If yes, record owner of biting animal, if known: \_\_\_\_\_ *If yes, carry out field investigation with the newly identified owner*
